# Supplementary material for: Upgrading the Properties of Ceramic-Coated Separators for Lithium Secondary Batteries by Changing the Mixing Order of the Water-Based Ceramic Slurry Components
Source: MDPI journal article supplement (doi:10.3390/batteries8070064), 2022-07-01
Supplement: s1 [file s1]

## Supplementary Materials

*Article*

# Upgrading the Properties of Ceramic-coated Separators for Lithium Secondary Batteries by Changing the Mixing Order of the Water-based Ceramic Slurry Components

Ssendagire Kennedy <sup>1</sup>, Jeong-Tae Kim <sup>1</sup>, Yong Min Lee <sup>2,\*</sup>, Isheunesu Phiri <sup>1,\*</sup> and Sun-Yul Ryou <sup>1,\*</sup>

<sup>1</sup> Department of Chemical and Biological Engineering, Hanbat National University, 125 Dongseo-daero, Yuseong-gu, Daejeon 34158, Korea; [ssendken1@gmail.com](mailto:ssendken1@gmail.com) (S.K.); [lab20172473@gmail.com](mailto:lab20172473@gmail.com) (J.-T.K.)

<sup>2</sup> Department of Energy Systems Engineering, Daegu Gyeongbuk Institute of Science and Technology (DGIST), 333 Techno Jungang-Daero, Daegu 42988, Korea

\* Correspondence: [yongmin.lee@dgist.ac.kr](mailto:yongmin.lee@dgist.ac.kr) (Y.M.L.); [isheunesuphiri@gmail.com](mailto:isheunesuphiri@gmail.com) (I.P.); [mhryou@hanbat.ac.kr](mailto:mhryou@hanbat.ac.kr) (S.-Y.R.)

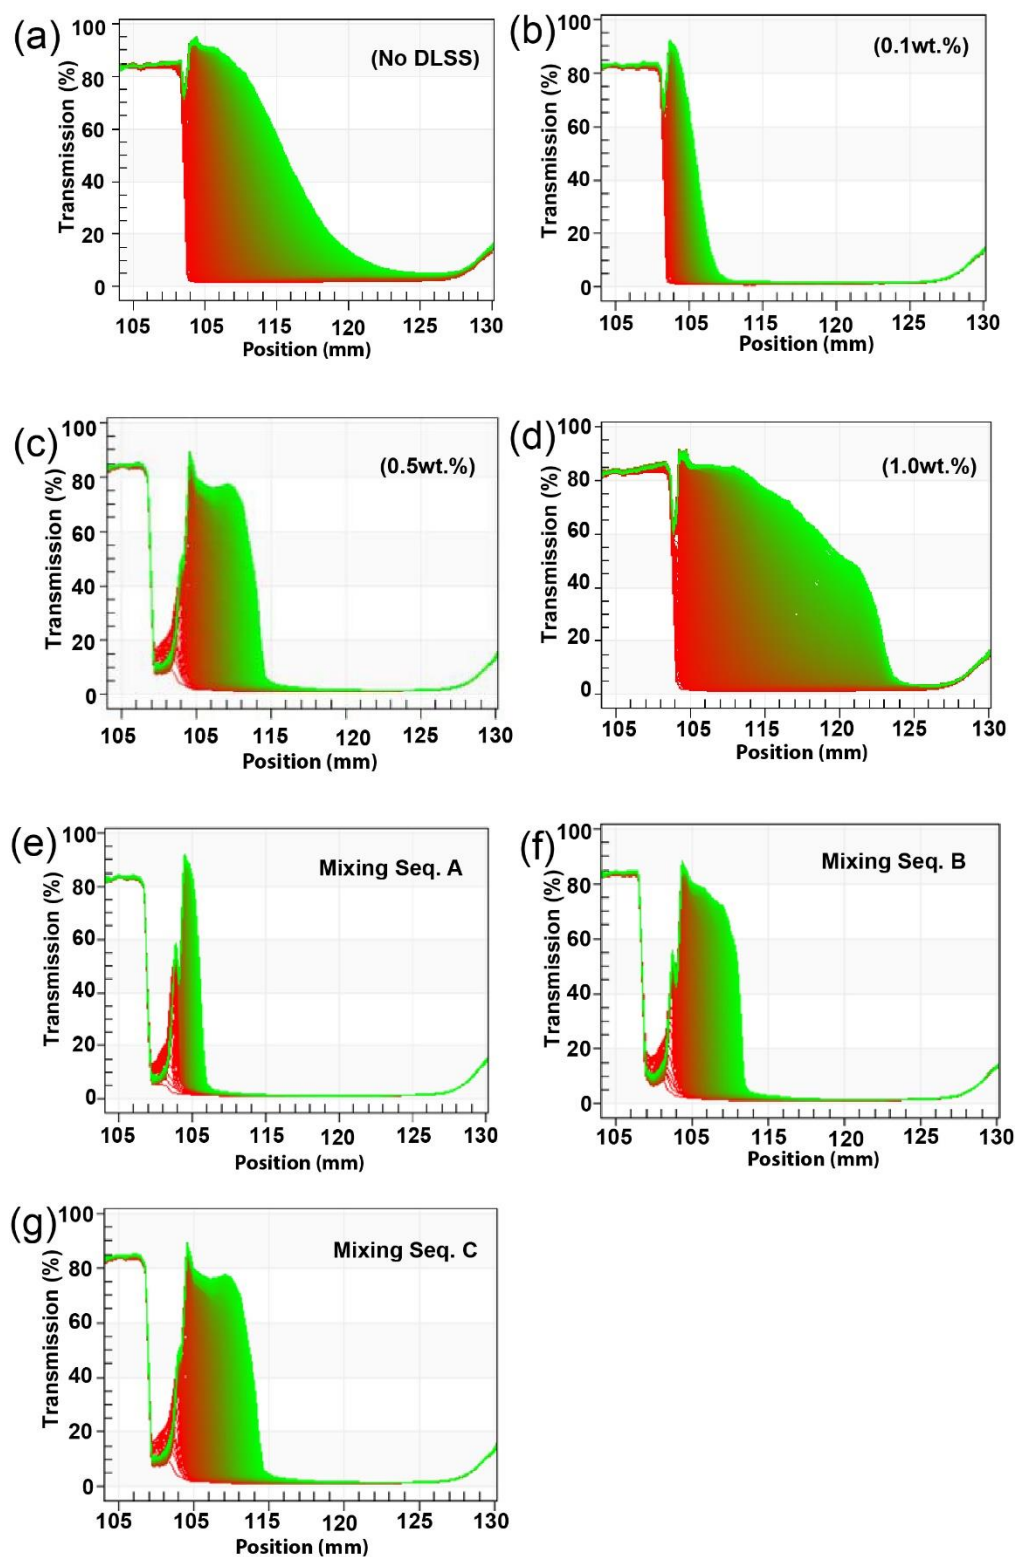

**Figure S1.** Fingerprints for transmission profiles; a-d) Optimization of DLSS and e-f) for the slurries prepared by mixing sequences A, B, and C.

**Table S1.** Summary of results for optimization of the amount of DLSS for stabilization evaluation of Al<sub>2</sub>O<sub>3</sub> slurries corresponding to Figure 1b.

| Amount of DLSS (wt.%) | Instability index | Sedimentation velocity ( $\mu\text{m s}^{-1}$ ) | Standard deviation ( $\pm\mu\text{m/s}$ ) |
|-----------------------|-------------------|-------------------------------------------------|-------------------------------------------|
| 0.0                   | 0.731             | 1.013                                           | 0.0058                                    |
| 0.1                   | 0.227             | 0.310                                           | 0.0014                                    |
| 0.5                   | 0.455             | 0.643                                           | 0.0085                                    |
| 1.0                   | 0.861             | 1.692                                           | 0.2220                                    |

**Table S2.** Instability index and sedimentation velocity of slurries according to different mixing sequences corresponding to Figure 2c.

|               | Instability index | Sedimentation velocity ( $\mu\text{m/s}$ ) | Standard deviation ( $\pm\mu\text{m/s}$ ) | Viscosity (p) |
|---------------|-------------------|--------------------------------------------|-------------------------------------------|---------------|
| Mixing seq. A | 0.136             | 0.149                                      | 0.0026                                    | 0.292         |
| Mixing seq. B | 0.339             | 0.408                                      | 0.0048                                    | 0.261         |
| Mixing seq. C | 0.408             | 0.516                                      | 0.0036                                    | 0.218         |
