# Supplementary material for: Upgrading the Properties of Ceramic-Coated Separators for Lithium Secondary Batteries by Changing the Mixing Order of the Water-Based Ceramic Slurry Components
Source: MDPI journal article supplement (doi:10.3390/batteries8070064), 2022-07-01
Supplement: s1 [file s1]

Archive with 1 entries (1 files):
- batteries-1747619-supplementary.pdf
